# Supplementary material for: The Involvement of Thiamine Uptake in the Virulence of Edwardsiella piscicida
Source: MDPI journal article supplement (doi:10.3390/pathogens11040464), 2022-04-13
Supplement: s1 [file s1]

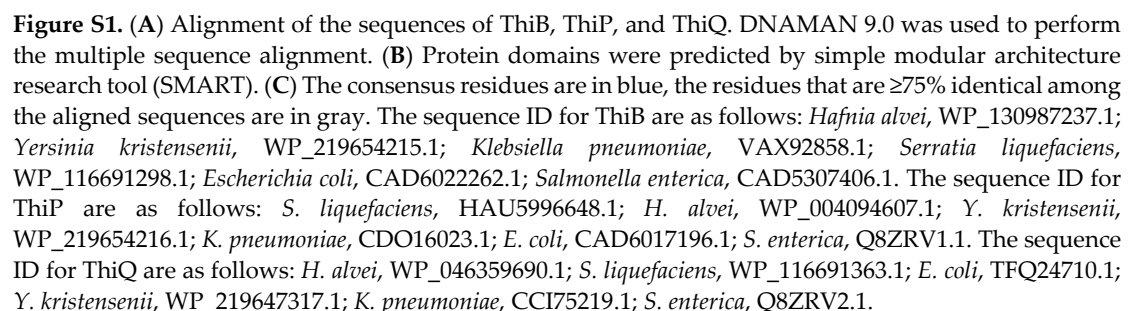

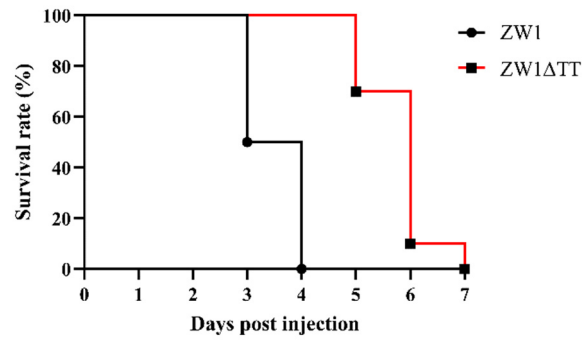

**Figure S2.** The survival rates of turbot infected with ZW1 and ZW1ΔTT. Turbot were injected intramuscularly with the wildtype *Edwardsiella piscicida* strain ZW1 or the TT mutant ZW1ΔTT at the same dose. The fish were monitored daily for survival

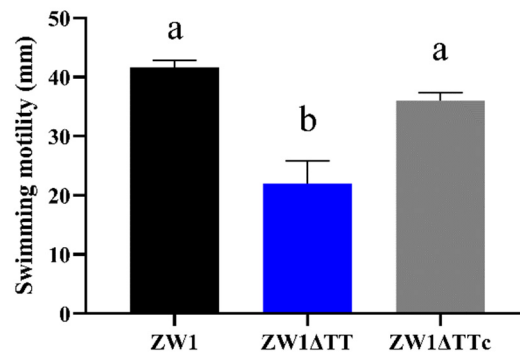

**Figure S3.** The effect of TT deletion on bacterial motility. ZW1, ZW1ΔTT, and ZW1ΔTTc were spotted onto the center of LB plates containing 0.3% agar. The plates were incubated at 28 °C for 48 h. The diameters of bacterial halos were recorded. Data are presented as means ± SD,  $n = 3$ . Data marked with different letters have statistically significant differences ( $p < 0.05$ ).

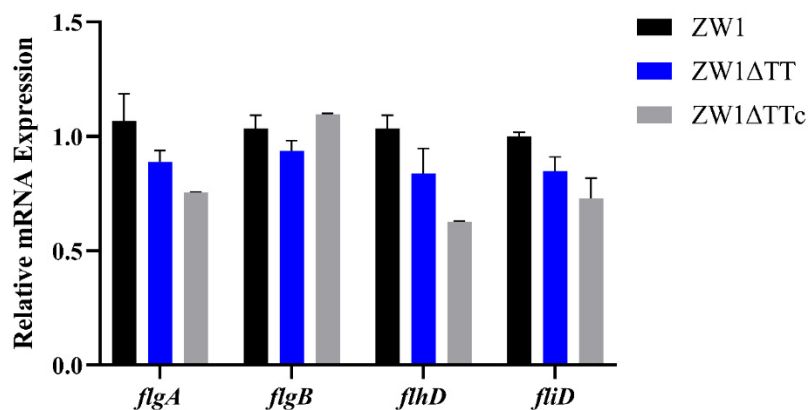

**Figure S4.** The effects of TT deletion on the expression of flagellar genes. The expression of *flgA*, *flgB*, *flhD*, and *fliD* in ZW1, ZW1ΔTT, and ZW1ΔTTc was determined by qRT-PCR. For the convenience of comparison, the expression levels in ZW1 were normalized as 1. Data are presented as means ± SD,  $n = 3$ .

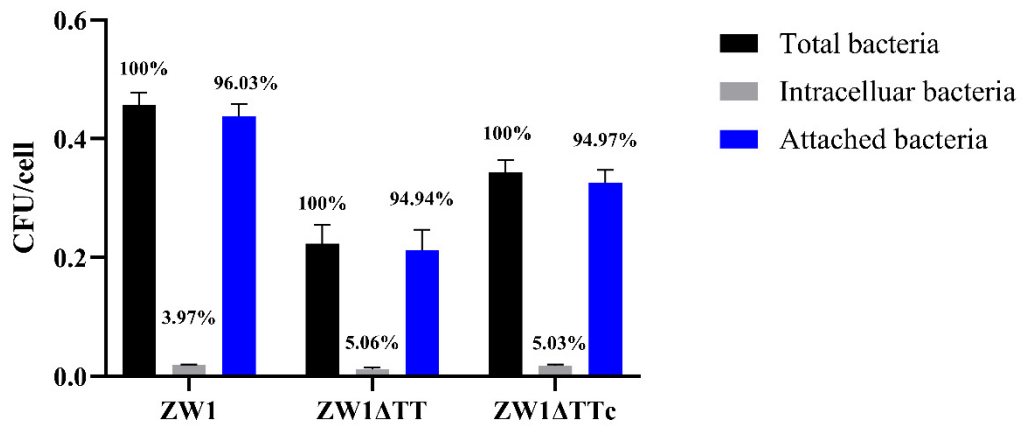

**Figure S5.** Bacteria recovery from turbot peripheral blood leukocytes (PBLs) infected with *Edwardsiella piscicida* strains. Turbot PBLs were infected with ZW1, ZW1ΔTT, or ZW1ΔTTc for 2 h at an MOI of 1:1. A portion of the cells was immediately lysed and determined for total bacterial recovery by plate count. Another portion of the cells was treated with gentamycin to kill the extracellular and surface-attached bacteria; the intracellular bacterial recovery was then determined by plate count. The amount of cell surface-attached bacteria was calculated by subtracting the intracellular bacterial recovery from the total bacterial recovery. For each strain, the total bacterial recovery was set as 100% for the convenience of comparison. Data are presented as means  $\pm$  SD,  $n = 3$ .

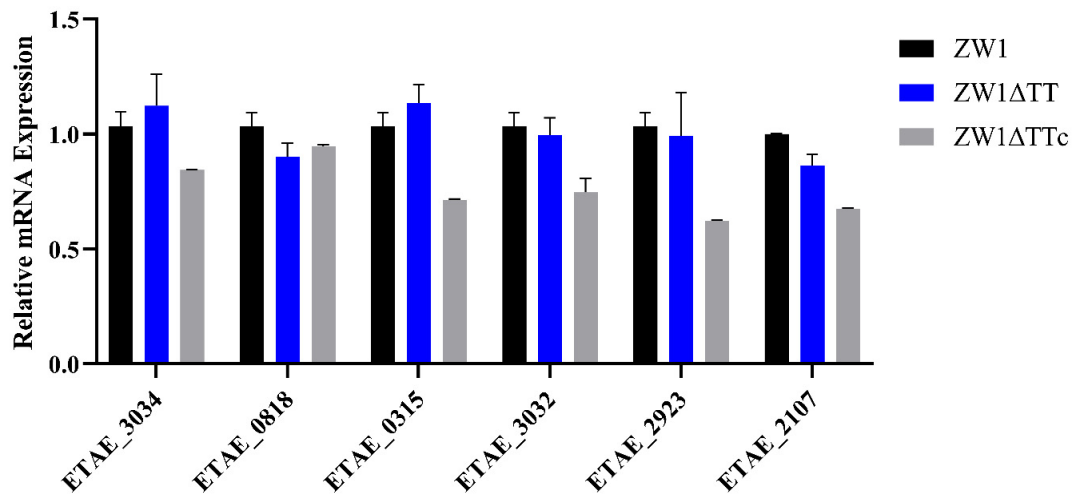

**Figure S6.** The effects of TT deletion on the expression of adhesion factor genes. The expression of ETA\_E\_3034, ETA\_E\_0818, ETA\_E\_0315, ETA\_E\_3032, ETA\_E\_2923, and ETA\_E\_2107 in ZW1, ZW1ΔTT, and ZW1ΔTTc was measured by qRT-PCR. For the convenience of comparison, the expression levels in ZW1 were normalized as 1. Data are presented as means  $\pm$  SD,  $n = 3$ .

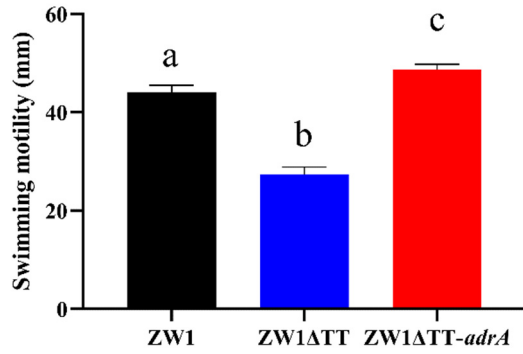

**Figure S7.** The effect of *adrA* overexpression on bacterial motility. ZW1, ZW1ΔTT, and ZW1ΔTT-*adrA* were spotted onto the center of LB plates containing 0.3% agar. The plates were incubated at 28 °C for 48 h. The diameters of bacterial halos were compared. Data are presented as means ± SD, *N*=3. Data marked with different letters have statistically significant differences (*p* < 0.05).

**Table S1.** Bacterial strains used in this study.

| Bacterial strains             | Description <sup>1</sup>                                                                      | Source     |
|-------------------------------|-----------------------------------------------------------------------------------------------|------------|
| <i>Edwardsiella piscicida</i> |                                                                                               |            |
| ZW1                           | Wild type strain, PMB <sup>r</sup>                                                            | This study |
| ZW1ΔTT                        | ZW1, with the thiamine transporter operon knockout, PMB <sup>r</sup> , Amp <sup>r</sup>       | This study |
| ZW1ΔTTc                       | ZW1ΔTT harboring the pCP1-TT, PMB <sup>r</sup> , Amp <sup>r</sup>                             | This study |
| ZW1/pCP1                      | ZW1 harboring the control plasmid pCP1, PMB <sup>r</sup> , Amp <sup>r</sup>                   | This study |
| ZW1ΔTT/pCP1                   | ZW1ΔTT harboring the control plasmid pCP1, PMB <sup>r</sup> , Amp <sup>r</sup>                | This study |
| ZW1/pOE1c                     | ZW1 harboring the control plasmid pOE1c, PMB <sup>r</sup> , Amp <sup>r</sup>                  | This study |
| ZW1ΔTT/pOE1c                  | ZW1ΔTT harboring the control plasmid pOE1c, PMB <sup>r</sup> , Amp <sup>r</sup>               | This study |
| ZW1ΔTT-1902                   | ZW1ΔTT harboring the plasmid pOE1-ETAE_1902, PMB <sup>r</sup> , Amp <sup>r</sup>              | This study |
| ZW1ΔTT-2842                   | ZW1ΔTT harboring the plasmid pOE1-ETAE_2842, PMB <sup>r</sup> , Amp <sup>r</sup>              | This study |
| ZW1/pOE1- <i>adrA</i> *       | ZW1 harboring the control plasmid pOE1- <i>adrA</i> *, PMB <sup>r</sup> , Amp <sup>r</sup>    | This study |
| ZW1ΔTT/pOE1- <i>adrA</i> *    | ZW1ΔTT harboring the control plasmid pOE1- <i>adrA</i> *, PMB <sup>r</sup> , Amp <sup>r</sup> | This study |
| ZW1ΔTT- <i>adrA</i>           | ZW1ΔTT harboring the plasmid pOE1- <i>adrA</i> , PMB <sup>r</sup> , Amp <sup>r</sup>          | This study |
| ZW1/pEGFP-N2                  | ZW1 harboring the control plasmid pEGFP-N2, PMB <sup>r</sup> , Kan <sup>r</sup>               | This study |
| ZW1ΔTT/pEGFP-N2               | ZW1ΔTT harboring the control plasmid pEGFP-N2, PMB <sup>r</sup> , Kan <sup>r</sup>            | This study |

|                         |                                                                          |                |
|-------------------------|--------------------------------------------------------------------------|----------------|
| ZW1/pNmA                | ZW1 harboring the plasmid pNmA, PMB <sup>r</sup> , Kan <sup>r</sup>      | This study     |
| ZW1ΔTT/pNmA             | ZW1ΔTT harboring the plasmid pNmA, PMB <sup>r</sup> , Kan <sup>r</sup>   | This study     |
| ZW1/pBc3-5              | ZW1 harboring the plasmid pBc3-5, PMB <sup>r</sup> , Kan <sup>r</sup>    | This study     |
| ZW1ΔTT/pBc3-5           | ZW1ΔTT harboring the plasmid pBc3-5, PMB <sup>r</sup> , Kan <sup>r</sup> | This study     |
| <i>Escherichia coli</i> |                                                                          |                |
| DH5α                    | Cloning host                                                             | Tsingke, China |
| MG1655                  | Clone template of <i>adrA</i>                                            | ATCC           |

---

<sup>1</sup> PMB, Polymyxin B; Amp, ampicillin; Kan, kanamycin. \* Inactivated mutant.
